# Supplementary material
Source: PubMed Central journal article supplement (PMC6860000)
Supplement: MCN-15-e12869-s001.pdf [file MCN-15-e12869-s001.pdf]

**Supplementary Table 1.** Associations between duration of any breastfeeding and type 2 diabetes in the included population and after imputation of missing values

| Duration of any breastfeeding (months) | Analytical sample (N=6,044) |                       | Multiple imputation model (N=7,458) |                       |
|----------------------------------------|-----------------------------|-----------------------|-------------------------------------|-----------------------|
|                                        | Unadjusted                  | Adjusted <sup>a</sup> | Unadjusted                          | Adjusted <sup>a</sup> |
| ≤0.5                                   | Reference                   | Reference             | Reference                           | Reference             |
| >0.5-1                                 | 0.74 (0.49-1.11)            | 0.81 (0.53-1.24)      | 0.77 (0.51-1.15)                    | 0.88 (0.58-1.33)      |
| >1-2                                   | 0.88 (0.62-1.25)            | 1.03 (0.72-1.49)      | 0.88 (0.63-1.25)                    | 1.07 (0.76-1.53)      |
| >2-4                                   | 0.67 (0.46-0.96)            | 0.80 (0.54-1.17)      | 0.69 (0.48-1.00)                    | 0.86 (0.59-1.26)      |
| >4                                     | 0.49 (0.32-0.75)            | 0.69 (0.44-1.07)      | 0.51 (0.34-0.79)                    | 0.74 (0.47-1.16)      |

<sup>a</sup> The table shows the hazard ratio and 95% confidence intervals adjusted for parental social status and education, maternal body mass index, maternal diabetes during pregnancy, smoking quantity during the third trimester, gestational weight gain, parity, preterm birth, birth weight and sex.

**Supplementary Table 2.** Characteristics of included study participants (n=6,044) and study participants who were excluded due to missing information on breastfeeding (n=1,414) from among eligible individuals).<sup>1</sup>

| Characteristics                                               | Included (n=6,044, 81%) |            |            | Excluded (n=1,414, 19%) |            |            | p-value <sup>2</sup> |
|---------------------------------------------------------------|-------------------------|------------|------------|-------------------------|------------|------------|----------------------|
|                                                               | N                       | Mean (SD)  | Min, max   | N                       | Mean (SD)  | Min, max   |                      |
| Maternal age at birth (years)                                 | 6,044                   | 25.4 (6.5) | 14, 48     | 1,414                   | 24.7 (6.4) | 14, 44     | <0.001               |
| Maternal pre-pregnancy BMI (kg/m <sup>2</sup> )               | 5,483                   | 21.8 (3.0) | 14.7, 47.8 | 1,175                   | 21.8 (2.9) | 15.6, 38.1 | 0.95                 |
| Parity                                                        | 6,044                   | 1.9 (1.2)  | 1, 9       | 1,414                   | 1.9 (1.2)  | 1, 8       | 0.69                 |
| Birth weight (kg)                                             | 5,995                   | 3.2 (0.6)  | 0.8, 5.5   | 1,326                   | 3.2 (0.6)  | 0.9, 5.2   | 0.90                 |
| 7-years BMI (kg/m <sup>2</sup> )                              | 2,426                   | 15.5 (1.4) | 11.1, 24.3 | 502                     | 15.5 (1.3) | 12.3, 20.8 | 0.28                 |
| 41-43-years BMI (kg/m <sup>2</sup> )                          | 3,391                   | 25.1 (4.5) | 14.1, 54.9 | 802                     | 25.1 (4.5) | 16.5, 48.4 | 0.82                 |
| Characteristics                                               | n                       |            | %          | n                       |            | %          | p-value <sup>3</sup> |
| Parental social status                                        |                         |            |            |                         |            |            | 0.01                 |
| Low: 0-6 points                                               | 1,241/5,372             |            | 23.1       | 165/575                 |            | 28.7       |                      |
| Medium: 7-10 points                                           | 2,288                   |            | 42.6       | 229                     |            | 39.8       |                      |
| High: 11-20 points                                            | 1,843                   |            | 34.3       | 181                     |            | 31.5       |                      |
| Breadwinner's education                                       |                         |            |            |                         |            |            | <0.001               |
| Remedial education                                            | 69/5,259                |            | 1.3        | 18/642                  |            | 2.8        |                      |
| Grade school                                                  | 3,528                   |            | 67.1       | 377                     |            | 58.7       |                      |
| High school                                                   | 1,107                   |            | 21.1       | 161                     |            | 25.1       |                      |
| College                                                       | 555                     |            | 10.6       | 86                      |            | 13.4       |                      |
| Maternal marital status, % married                            | 3,773/5,955             |            | 63.4       | 774/1,391               |            | 55.6       | <0.001               |
| Attitude toward pregnancy, % wanted                           | 2,557/5,828             |            | 43.9       | 516/1,346               |            | 38.3       | <0.001               |
| Categories of maternal pre-pregnancy BMI (kg/m <sup>2</sup> ) |                         |            |            |                         |            |            | 0.99                 |
| < 18.5                                                        | 476/5,483               |            | 8.7        | 105/1,175               |            | 8.9        |                      |
| ≥ 18.5 & < 25                                                 | 4,383                   |            | 79.9       | 939                     |            | 79.9       |                      |
| ≥ 25 & < 30                                                   | 533                     |            | 9.7        | 112                     |            | 9.5        |                      |
| ≥ 30                                                          | 91                      |            | 1.7        | 19                      |            | 1.6        |                      |
| Maternal diabetes during pregnancy, % yes                     | 62/6,043                |            | 1.0        | 16/1,414                |            | 1.1        | 0.73                 |

**Supplementary Table 2. Continued**

| Characteristics                                     | n                     | %             | n                     | %             | p-value <sup>3</sup>       |
|-----------------------------------------------------|-----------------------|---------------|-----------------------|---------------|----------------------------|
| Smoking during the third trimester (cigarettes/day) |                       |               |                       |               | 0.77                       |
| None                                                | 2,870/5,952           | 48.2          | 661/1,382             | 47.8          |                            |
| < 3                                                 | 417                   | 7.0           | 88                    | 6.4           |                            |
| 2-10                                                | 1,791                 | 30.1          | 434                   | 31.4          |                            |
| 11-20                                               | 782                   | 13.1          | 175                   | 12.7          |                            |
| >20                                                 | 92                    | 1.6           | 24                    | 1.7           |                            |
| Gestational weight gain (kg)                        |                       |               |                       |               | 0.38                       |
| < 6                                                 | 277/3,594             | 7.7           | 65/784                | 8.3           |                            |
| 6-8                                                 | 597                   | 16.6          | 131                   | 16.7          |                            |
| 9-10                                                | 658                   | 18.3          | 125                   | 15.9          |                            |
| 11-12                                               | 618                   | 17.2          | 151                   | 19.3          |                            |
| 13-15                                               | 738                   | 20.5          | 171                   | 21.8          |                            |
| >16                                                 | 706                   | 19.6          | 141                   | 18.0          |                            |
| Died during the first year of life, % yes           | 0/6,044               | 0             | 0/1,414               | 0             | NA                         |
| Sex, % boys                                         | 3,057/6,044           | 50.6          | 705/1,414             | 49.9          | 0.62                       |
| Preterm birth <sup>4</sup> , % yes                  | 902/4,867             | 18.5          | 208/1,150             | 18.1          | 0.72                       |
| Birth weight (g)                                    |                       |               |                       |               | 0.33                       |
| ≤ 2750                                              | 1,153/5,995           | 19.2          | 258/1,326             | 19.5          |                            |
| > 2750-3250                                         | 1,973                 | 32.9          | 417                   | 31.5          |                            |
| > 3250-3750                                         | 1,935                 | 32.3          | 465                   | 35.1          |                            |
| > 3750-4250                                         | 745                   | 12.4          | 153                   | 11.5          |                            |
| > 4250-4750                                         | 165                   | 2.8           | 28                    | 2.1           |                            |
| > 4750                                              | 24                    | 0.4           | 5                     | 0.4           |                            |
| Age at introduction of spoon feeding (months)       |                       |               |                       |               | 0.08                       |
| 0-2                                                 | 957/5,341             | 17.9          | 83/447                | 18.6          |                            |
| 3-5                                                 | 3,641                 | 68.2          | 283                   | 63.3          |                            |
| 6-8                                                 | 677                   | 12.7          | 74                    | 16.6          |                            |
| 9-11                                                | 66                    | 1.2           | 7                     | 1.6           |                            |
|                                                     | <b>Incidence rate</b> | <b>95% CI</b> | <b>Incidence rate</b> | <b>95% CI</b> | <b>p-value<sup>5</sup></b> |
| Type 2 diabetes                                     | 1.64                  | (1.44-1.84)   | 1.79                  | (1.39-2.31)   | 0.50                       |

<sup>1</sup> The table provides the number of individuals with information available and the percentages within a given category of the characteristics. <sup>2</sup> P-value from t-tests. <sup>3</sup> Chi-square test. <sup>4</sup> Defined as < 38 weeks of gestational age. <sup>5</sup> P-value from a Cox regression analysis.

**Supplementary Table 3.** Relationship between covariates and duration of any breastfeeding

| Characteristics                                    | Chi-square test, p-value with missing group included | Chi-square test, p-value, after exclusion of missings | One way anova, p-value |
|----------------------------------------------------|------------------------------------------------------|-------------------------------------------------------|------------------------|
| Parental social status                             | <0.001                                               | <0.001                                                |                        |
| Breadwinner's education                            | <0.001                                               | <0.001                                                |                        |
| Maternal marital status, % married                 | <0.001                                               | <0.001                                                |                        |
| Maternal age at birth (years)                      |                                                      |                                                       | <0.001                 |
| Attitude towards pregnancy, % wanted               | <0.001                                               | <0.001                                                |                        |
| Maternal pre-pregnancy BMI                         | <0.001                                               | <0.001                                                | <0.001 <sup>b</sup>    |
| Smoking in pregnancy, % smoking                    | <0.001                                               | <0.001                                                |                        |
| Smoking during the third trimester, cigarettes/day | <0.001                                               | <0.001                                                |                        |
| Gestational weight gain                            | <0.001                                               | <0.001                                                | 0.0001 <sup>b</sup>    |
| Maternal diabetes during pregnancy, % yes          | 0.003 <sup>a</sup>                                   | <0.001 <sup>a</sup>                                   |                        |
| Sex, % boys                                        | 0.87                                                 | 0.87                                                  |                        |
| Parity                                             |                                                      |                                                       | <0.001                 |
| Preterm birth <sup>2</sup> , % yes                 | <0.001                                               | <0.001                                                |                        |
| Birth weight (categorical)                         | <0.001 <sup>a</sup>                                  | <0.001 <sup>a</sup>                                   |                        |
| Age at introduction of spoon-feeding               | <0.001 <sup>a</sup>                                  | <0.001 <sup>a</sup>                                   |                        |
| BMI at 7 years                                     |                                                      |                                                       | 0.60                   |
| 41-43-years BMI (kg/m <sup>2</sup> /years)         |                                                      |                                                       | 0.009 <sup>b</sup>     |
| 41-43-years BMI ≥ 25 kg/m <sup>2</sup>             |                                                      | <0.001                                                |                        |
| 41-43-years BMI ≥ 30 kg/m <sup>2</sup>             |                                                      | 0.20                                                  |                        |

<sup>a</sup> Cells with < 5 individuals.

<sup>b</sup> N < 6044

**Supplementary Table 4.** Associations between duration of any breastfeeding and type 2 diabetes with and without adjustment for covariates, one at a time.

| Characteristics, N                              |       | Unadjusted<br>HR (95% CI) | Adjusted<br>HR   | % change log-scale <sup>a</sup> |
|-------------------------------------------------|-------|---------------------------|------------------|---------------------------------|
| <b>Parental social class</b>                    |       |                           |                  |                                 |
| ≤ 0.5 months                                    | 5,372 | 1                         |                  |                                 |
| >0.5-1 months                                   |       | 0.77 (0.50-1.18)          | 0.76 (0.50-1.18) | -2.02                           |
| >1-2 months                                     |       | 0.89 (0.61-1.30)          | 0.91 (0.63-1.33) | 18.02                           |
| >2-4 months                                     |       | 0.69 (0.47-1.02)          | 0.73 (0.49-1.07) | 13.32                           |
| > 4 months                                      |       | 0.51 (0.33-0.79)          | 0.58 (0.37-0.91) | 19.31                           |
| <b>Breadwinner's education</b>                  |       |                           |                  |                                 |
| ≤ 0.5 months                                    | 5,259 | 1                         |                  |                                 |
| >0.5-1 months                                   |       | 0.77 (0.50-1.19)          | 0.76 (0.49-1.18) | -4.19                           |
| >1-2 months                                     |       | 0.89 (0.61-1.31)          | 0.91 (0.62-1.34) | 19.48                           |
| >2-4 months                                     |       | 0.71 (0.48-1.05)          | 0.73 (0.50-1.09) | 8.94                            |
| > 4 months                                      |       | 0.51 (0.32-0.80)          | 0.57 (0.36-0.90) | 16.92                           |
| <b>Maternal marital status</b>                  |       |                           |                  |                                 |
| ≤ 0.5 months                                    | 5,955 | 1                         |                  |                                 |
| >0.5-1 months                                   |       | 0.75 (0.50-1.14)          | 0.75 (0.50-1.14) | -0.41                           |
| >1-2 months                                     |       | 0.88(0.62-1.26)           | 0.88 (0.62-1.25) | -1.17                           |
| >2-4 months                                     |       | 0.65 (0.45-0.95)          | 0.65 (0.45-0.95) | -0.67                           |
| > 4 months                                      |       | 0.48 (0.31-0.74)          | 0.47 (0.31-0.4)  | -0.85                           |
| <b>Maternal age</b>                             |       |                           |                  |                                 |
| ≤ 0.5 months                                    | 6,044 | 1                         |                  |                                 |
| >0.5-1 months                                   |       | 0.74 (0.49-1.11)          | 0.73 (0.49-1.10) | -2.14                           |
| >1-2 months                                     |       | 0.88 (0.62-1.25)          | 0.87 (0.62-1.24) | -3.45                           |
| >2-4 months                                     |       | 0.67 (0.46-0.96)          | 0.67 (0.46-0.96) | -0.04                           |
| > 4 months                                      |       | 0.49 (0.32-0.75)          | 0.49 (0.32-0.76) | 1.68                            |
| <b>Attitude towards pregnancy</b>               |       |                           |                  |                                 |
| ≤ 0.5 months                                    | 5,828 | 1                         |                  |                                 |
| >0.5-1 months                                   |       | 0.75 (0.49-1.15)          | 0.75 (0.49-1.15) | 0.06                            |
| >1-2 months                                     |       | 0.88 (0.61-1.26)          | 0.88 (0.61-1.26) | 0.21                            |
| >2-4 months                                     |       | 0.69 (0.48-1.01)          | 0.69 (0.47-1.02) | 0.14                            |
| > 4 months                                      |       | 0.51 (0.33-0.79)          | 0.51 (0.33-0.79) | 0.14                            |
| <b>Maternal pre-pregnancy BMI</b>               |       |                           |                  |                                 |
| ≤ 0.5 months                                    | 5,483 | 1                         |                  |                                 |
| >0.5-1 months                                   |       | 0.77 (0.50-1.19)          | 0.80 (0.52-1.23) | 12.96                           |
| >1-2 months                                     |       | 0.88 (0.61-1.28)          | 0.93 (0.64-1.35) | 43.32                           |
| >2-4 months                                     |       | 0.71 (0.48-1.04)          | 0.74 (0.50-1.09) | 11.87                           |
| > 4 months                                      |       | 0.52 (0.33-0.81)          | 0.54 (0.35-0.84) | 5.69                            |
| <b>No. of cigarettes in the third trimester</b> |       |                           |                  |                                 |
| ≤ 0.5 months                                    | 5,952 | 1                         |                  |                                 |
| >0.5-1 months                                   |       | 0.75 (0.49-1.13)          | 0.74 (0.49-1.12) | -0.95                           |
| >1-2 months                                     |       | 0.86 (0.60-1.22)          | 0.87 (0.61-1.24) | 8.20                            |
| >2-4 months                                     |       | 0.66 (0.46-0.96)          | 0.68 (0.47-0.98) | 5.67                            |
| > 4 months                                      |       | 0.50 (0.32-0.76)          | 0.54 (0.35-0.84) | 13.23                           |

**Supplementary Table 4.** Continued

| Characteristics, N             | Unadjusted<br>HR (95% CI) | Adjusted<br>HR   | % change log-scale <sup>a</sup> |
|--------------------------------|---------------------------|------------------|---------------------------------|
| <b>Gestational weight gain</b> |                           |                  |                                 |
| ≤ 0.5 months<br>3,594          | 1                         |                  |                                 |
| >0.5-1 months                  | 0.91 (0.54-1.54)          | 0.94 (0.55-1.60) | 35.30                           |
| >1-2 months                    | 0.77 (0.47-1.27)          | 0.80 (0.49-1.32) | 15.87                           |
| >2-4 months                    | 0.85 (0.54-1.36)          | 0.90 (0.57-1.44) | 34.25                           |
| > 4 months                     | 0.65 (0.38-1.10)          | 0.68 (0.40-1.16) | 11.79                           |
| <b>Maternal diabetes</b>       |                           |                  |                                 |
| ≤ 0.5 months<br>6,043          | 1                         |                  |                                 |
| >0.5-1 months                  | 0.74 (0.49-1.12)          | 0.76 (0.50-1.15) | 7.02                            |
| >1-2 months                    | 0.89 (0.63-1.26)          | 0.91 (0.64-1.30) | 23.03                           |
| >2-4 months                    | 0.67 (0.47-0.98)          | 0.69 (0.48-1.00) | 5.10                            |
| > 4 months                     | 0.49 (0.32-0.75)          | 0.51 (0.33-0.78) | 4.36                            |
| <b>Sex</b>                     |                           |                  |                                 |
| ≤ 0.5 months<br>6,044          | 1                         |                  |                                 |
| >0.5-1 months                  | 0.74 (0.49-1.11)          | 0.74 (0.49-1.11) | 1.52                            |
| >1-2 months                    | 0.88 (0.62-1.25)          | 0.88 (0.62-1.24) | -2.49                           |
| >2-4 months                    | 0.67 (0.46-0.96)          | 0.67 (0.46-0.97) | 0.67                            |
| > 4 months                     | 0.49 (0.32-0.75)          | 0.49 (0.32-0.75) | -0.03                           |
| <b>Parity</b>                  |                           |                  |                                 |
| ≤ 0.5 months<br>6,044          | 1                         |                  |                                 |
| >0.5-1 months                  | 0.74 (0.49-1.11)          | 0.75 (0.49-1.12) | 4.08                            |
| >1-2 months                    | 0.88 (0.62-1.25)          | 0.89 (0.63-1.27) | 13.06                           |
| >2-4 months                    | 0.67 (0.46-0.96)          | 0.68 (0.47-0.98) | 3.92                            |
| > 4 months                     | 0.49 (0.32-0.75)          | 0.49 (0.32-0.75) | 1.42                            |
| <b>Birth weight</b>            |                           |                  |                                 |
| ≤ 0.5 months<br>5,995          | 1                         |                  |                                 |
| >0.5-1 months                  | 0.74 (0.49-1.12)          | 0.77 (0.51-1.17) | 13.70                           |
| >1-2 months                    | 0.89 (0.62-1.26)          | 0.92 (0.65-1.31) | 31.86                           |
| >2-4 months                    | 0.67 (0.46-0.97)          | 0.70 (0.48-1.02) | 10.64                           |
| > 4 months                     | 0.47 (0.31-0.73)          | 0.50 (0.32-0.78) | 7.50                            |
| <b>Preterm birth</b>           |                           |                  |                                 |
| ≤ 0.5 months<br>4,867          | 1                         |                  |                                 |
| >0.5-1 months                  | 0.76 (0.48-1.20)          | 0.77 (0.49-1.23) | 7.22                            |
| >1-2 months                    | 0.91 (0.61-1.34)          | 0.93 (0.63-1.37) | 20.46                           |
| >2-4 months                    | 0.66 (0.43-1.00)          | 0.67 (0.44-1.02) | 4.30                            |
| > 4 months                     | 0.46 (0.29-0.75)          | 0.47 (0.29-0.77) | 2.73                            |
| <b>Age at spoon feeding</b>    |                           |                  |                                 |
| ≤ 0.5 months<br>5,341          | 1                         |                  |                                 |
| >0.5-1 months                  | 0.75 (0.48-1.17)          | 0.76 (0.49-1.18) | 1.86                            |
| >1-2 months                    | 0.89 (0.61-1.30)          | 0.88 (0.60-1.29) | -3.58                           |
| >2-4 months                    | 0.69 (0.47-1.03)          | 0.71 (0.48-1.05) | 5.66                            |
| > 4 months                     | 0.50 (0.32-0.78)          | 0.50 (0.32-0.79) | -0.28                           |

<sup>a</sup> This % is calculated as  $(\log(\text{HR}_{\text{unadjusted}}) - \log(\text{HR}_{\text{adjusted}})) / \log(\text{HR}_{\text{unadjusted}}) * 100$ .

**Supplementary Table 5.** Associations between covariates and type 2 diabetes from bivariate analyses.<sup>a</sup>

| <b>Characteristics</b>                                        | <b>HR (95% CI)</b> | <b>P<sup>b</sup></b> |
|---------------------------------------------------------------|--------------------|----------------------|
| Parental social status                                        |                    | 0.0005               |
| Low: 0-6 points                                               | 1                  |                      |
| Medium: 7-10 points                                           | 0.78 (0.57-1.06)   |                      |
| High: 11-20 points                                            | 0.48 (0.33-0.70)   |                      |
| Breadwinner's education                                       |                    | 0.02                 |
| Remedial education                                            | 1                  |                      |
| Grade school                                                  | 1.55 (0.38-6.25)   |                      |
| High school                                                   | 1.25 (0.30-5.18)   |                      |
| College                                                       | 0.55 (0.12-2.55)   |                      |
| Maternal marital status                                       | 1                  | 0.61                 |
| Yes                                                           |                    |                      |
| No                                                            | 1.07 (0.82-1.40)   |                      |
| Maternal age (years)                                          | 0.99 (0.97-1.01)   | 0.34                 |
| Attitude toward pregnancy                                     |                    | 0.50                 |
| Child wanted                                                  | 1                  |                      |
| Child unwanted                                                | 1.10 (0.84-1.43)   |                      |
| Categories of maternal pre-pregnancy BMI (kg/m <sup>2</sup> ) |                    | 0.0001               |
| < 18.5                                                        | 0.70 (0.39-1.26)   |                      |
| ≥ 18.5 & < 25                                                 | 1                  |                      |
| ≥ 25 & < 30                                                   | 1.85 (1.28-2.67)   |                      |
| ≥ 30                                                          | 2.86 (1.46-5.59)   |                      |
| Maternal pre-pregnancy BMI (kg/m <sup>2</sup> )               | 1.09 (1.06-1.13)   | <0.0001              |
| Smoking in pregnancy                                          |                    | 0.01                 |
| No                                                            | 1                  |                      |
| Yes                                                           | 1.41 (1.08-1.83)   |                      |
| Smoking during the third trimester (cigarettes/day)           |                    | 0.0009               |
| None                                                          | 1                  |                      |
| < 3                                                           | 0.81 (0.44-1.52)   |                      |
| 2-10                                                          | 1.27 (0.94-1.72)   |                      |
| 11-20                                                         | 2.01 (1.43-2.83)   |                      |
| >20                                                           | 0.66 (0.16-2.68)   |                      |
| Gestational weight gain (kg)                                  |                    | 0.07                 |
| < 6                                                           | 2.05 (1.15-3.65)   |                      |
| 6-8                                                           | 1.02 (0.58-1.80)   |                      |
| 9-10                                                          | 1.06 (0.61-1.82)   |                      |
| 11-12                                                         | 0.80 (0.44-1.45)   |                      |
| 13-15                                                         | 1                  |                      |
| >16                                                           | 1.02 (0.60-1.75)   |                      |
| Gestational weight gain (kg)                                  | 0.97 (0.92-1.01)   | 0.14                 |
| Maternal diabetes during pregnancy                            |                    | 0.0005               |
| No                                                            | 1                  |                      |
| Yes                                                           | 3.52 (1.74-7.13)   |                      |

**Online Supporting Material**  
Breastfeeding duration and adult T2D

|                                               |                   |      |
|-----------------------------------------------|-------------------|------|
| Parity                                        | 1.06 (0.96-1.18)  | 0.23 |
| Birth weight (g)                              |                   |      |
| ≤ 2750                                        | 1.48 (1.04-2.10)  | 0.24 |
| > 2750-3250                                   | 1.11 (0.80-1.54)  |      |
| > 3250-3750                                   | 1                 |      |
| > 3750-4250                                   | 0.91 (0.57-1.45)  |      |
| > 4250-4750                                   | 0.87 (0.35-2.16)  |      |
| >4750                                         | 1.32 (0.18-9.49)  |      |
| Preterm birth                                 |                   | 0.18 |
| No                                            | 1                 |      |
| Yes                                           | 1.27 (0.90-1.78)  |      |
| Sex                                           |                   | 0.03 |
| Boys                                          | 1.35 (1.05-1.75)  |      |
| Age at introduction of spoon-feeding (months) |                   | 0.47 |
| 0-2                                           | 1                 |      |
| 3-5                                           | 0.83 (0.59-1.1.6) |      |
| 6-8                                           | 0.78 (0.47-1.28)  |      |
| 9-11                                          | 1.45 (0.52-4.03)  |      |

<sup>a</sup> N<6044 if some individuals had missing information on the variable.

<sup>b</sup> P-value from a chi-square test for overall effect of the variable, i.e. that all estimates are = 0.



**Supplementary Table 6.** Duration of any breastfeeding and risk of type 2 diabetes adjusted for factors adjusted for factors that were significantly associated with breastfeeding and type 2 diabetes in the present data.

| <b>Breastfeeding (months)</b> | <b>Adjusted<sup>a,b</sup></b> |
|-------------------------------|-------------------------------|
| ≤0.5                          | Reference                     |
| >0.5-1                        | 0.76 (0.50-1.15)              |
| >1-2                          | 0.97 (0.68-1.39)              |
| >2-4                          | 0.74 (0.51-1.09)              |
| >4                            | 0.64 (0.41-1.005)             |

<sup>a</sup> Adjusted for parental social status and education, maternal body mass index, maternal diabetes during pregnancy and smoking quantity during the third trimester.

<sup>b</sup> p-overall=0.20.

**Supplementary Table 7.** Duration of exclusive breastfeeding and risk of type 2 diabetes unadjusted and adjusted for factors early in life

| <b>Duration of exclusive breastfeeding (months)</b> | <b>Analytical sample (N=5,675)</b> |                             |
|-----------------------------------------------------|------------------------------------|-----------------------------|
|                                                     | <b>Unadjusted</b>                  | <b>Adjusted<sup>a</sup></b> |
| ≤0.5                                                | Reference                          | Reference                   |
| >0.5-1                                              | 0.78 (0.53-1.18)                   | 0.84 (0.56-1.27)            |
| >1-2                                                | 0.93 (0.66-1.30)                   | 1.08 (0.76-1.55)            |
| >2-4                                                | 0.57 (0.39-0.84)                   | 0.71 (0.47-1.07)            |
| >4                                                  | 0.51 (0.29-0.90)                   | 0.68 (0.38-1.21)            |

<sup>a</sup> The table shows the hazard ratio and 95% confidence intervals adjusted for parental social status and education, maternal body mass index, maternal diabetes during pregnancy, smoking quantity during the third trimester, gestational weight gain, parity, preterm birth, birth weight and sex.

**Supplementary Table 8.** Characteristics of individuals with information on BMI at 7 years (n=2,426) and those without BMI at 7 years (n=3,618) from among included individuals.<sup>1</sup>

| Characteristics                                               | With child BMI (n=2,426) |            |            | Without child BMI (n=3,618) |            |            | p-value <sup>2</sup> |
|---------------------------------------------------------------|--------------------------|------------|------------|-----------------------------|------------|------------|----------------------|
|                                                               | N                        | Mean (SD)  | Min, max   | N                           | Mean (SD)  | Min, max   |                      |
| Maternal age at birth (years)                                 | 2,426                    | 26.1 (6.1) | 14, 48     | 3,618                       | 25.0 (6.4) | 14, 47     | <0.001               |
| Maternal pre-pregnancy BMI (kg/m <sup>2</sup> )               | 2,223                    | 21.9 (3.2) | 14.7, 47.8 | 3,260                       | 21.8 (2.9) | 14.8, 46.6 | 0.22                 |
| Parity                                                        | 2,426                    | 1.9 (1.2)  | 1, 9       | 3,618                       | 1.9 (1.2)  | 1, 9       | 0.73                 |
| Birth weight (kg)                                             | 2,399                    | 3.2 (0.6)  | 0.8, 5.5   | 3,596                       | 3.2 (0.6)  | 0.9, 5.5   | 0.04                 |
| 7-years BMI (kg/m <sup>2</sup> )                              | 2,426                    | 15.5 (1.4) | 11.1, 24.3 | NA                          | NA         | NA         | NA                   |
| 41-43-years BMI (kg/m <sup>2</sup> )                          | 1,442                    | 24.9 (4.3) | 14.1, 54.9 | 1,949                       | 25.3 (4.6) | 15.9, 49.8 | 0.005                |
| Characteristics                                               | n                        |            | %          | n                           |            | %          | p-value <sup>3</sup> |
| Parental social status                                        |                          |            |            |                             |            |            | 0.02                 |
| Low: 0-6 points                                               | 481/2,233                |            | 21.5       | 760/3,139                   |            | 24.2       |                      |
| Medium: 7-10 points                                           | 944                      |            | 42.3       | 1,344                       |            | 42.8       |                      |
| High: 11-20 points                                            | 808                      |            | 36.2       | 1,035                       |            | 33.0       |                      |
| Breadwinner's education                                       |                          |            |            |                             |            |            | 0.003                |
| Remedial education                                            | 20/2,178                 |            | 0.9        | 49/3,081                    |            | 1.6        |                      |
| Grade school                                                  | 1,418                    |            | 65.1       | 2,110                       |            | 68.5       |                      |
| High school                                                   | 486                      |            | 22.3       | 621                         |            | 20.2       |                      |
| College                                                       | 254                      |            | 11.7       | 301                         |            | 9.8        |                      |
| Maternal marital status, % married                            | 1,574/2,394              |            | 65.8       | 2,199/3,561                 |            | 61.8       | 0.002                |
| Attitude toward pregnancy, % wanted                           | 1,249/2,353              |            | 46.9       | 1,453/3,475                 |            | 41.8       | <0.001               |
| Categories of maternal pre-pregnancy BMI (kg/m <sup>2</sup> ) |                          |            |            |                             |            |            | 0.02                 |
| < 18.5                                                        | 182/2,223                |            | 8.2        | 294/3,260                   |            | 9.0        |                      |
| ≥ 18.5 & < 25                                                 | 1,783                    |            | 80.2       | 2,600                       |            | 79.8       |                      |
| ≥ 25 & < 30                                                   | 208                      |            | 9.4        | 325                         |            | 10.0       |                      |
| ≥ 30                                                          | 50                       |            | 2.3        | 41                          |            | 1.3        |                      |
| Maternal diabetes during pregnancy, % yes                     | 27/2,426                 |            | 1.1        | 35/3,617                    |            | 1.0        | 0.58                 |
| Smoking during the third trimester, cigarettes/day            |                          |            |            |                             |            |            | 0.13                 |
| None                                                          | 1,191/2,396              |            | 49.7       | 1,679/3,556                 |            | 47.2       |                      |
| < 3                                                           | 162                      |            | 6.7        | 255                         |            | 7.2        |                      |
| 2-10                                                          | 680                      |            | 28.4       | 1,111                       |            | 31.2       |                      |
| 11-20                                                         | 328                      |            | 13.7       | 454                         |            | 12.8       |                      |
| > 20                                                          | 35                       |            | 1.5        | 57                          |            | 1.6        |                      |

**Supplementary table 8.** Continued.

| Characteristics                           | n                     | %             | n                     | %             | p-value <sup>3</sup>       |
|-------------------------------------------|-----------------------|---------------|-----------------------|---------------|----------------------------|
| Gestational weight gain (kg)              |                       |               |                       |               | 0.31                       |
| < 6                                       | 104/1,498             | 6.9           | 173/2,096             | 8.3           |                            |
| 6-8                                       | 260                   | 17.4          | 337                   | 16.1          |                            |
| 9-10                                      | 265                   | 17.7          | 393                   | 18.8          |                            |
| 11-12                                     | 257                   | 17.2          | 361                   | 17.2          |                            |
| 13-15                                     | 327                   | 21.8          | 411                   | 19.6          |                            |
| > 16                                      | 285                   | 19.0          | 421                   | 20.1          |                            |
| Died during the first year of life, % yes | 0/2,426               | 0             | 0/3,618               | 0             | NA                         |
| Sex, % boys                               | 1,195/2,426           | 49.3          | 1,862/3,618           | 51.5          | 0.09                       |
| Preterm birth <sup>4</sup> , % yes        | 357/2,002             | 17.8          | 545/2,865             | 19.0          | 0.29                       |
| Birth weight (g)                          |                       |               |                       |               | 0.36                       |
| ≤ 2750                                    | 440/2,399             | 18.3          | 713/3,596             | 19.8          |                            |
| > 2750-3250                               | 774                   | 32.3          | 1,199                 | 33.3          |                            |
| > 3250-3750                               | 792                   | 33.0          | 1,143                 | 31.9          |                            |
| > 3750-4250                               | 318                   | 13.3          | 427                   | 11.9          |                            |
| > 4250-4750                               | 67                    | 2.8           | 98                    | 2.7           |                            |
| > 4750                                    | 8                     | 0.3           | 16                    | 0.4           |                            |
| Duration of any breastfeeding (months)    |                       |               |                       |               | <0.001                     |
| ≤ 0.5                                     | 635/2,426             | 26.2          | 1,107/3,618           | 30.6          |                            |
| > 0.5-1                                   | 316                   | 13.0          | 511                   | 14.1          |                            |
| > 1-2                                     | 454                   | 18.7          | 655                   | 18.1          |                            |
| > 2-4                                     | 553                   | 22.8          | 688                   | 19.0          |                            |
| > 4                                       | 468                   | 19.3          | 657                   | 18.2          |                            |
| Age at introduction of spoon feeding      |                       |               |                       |               | 0.81                       |
| 0-2 months                                | 403/2,203             | 18.3          | 554/3,138             | 17.7          |                            |
| 3-5 months                                | 1,486                 | 67.5          | 2,155                 | 68.7          |                            |
| 6-8 months                                | 287                   | 13.0          | 390                   | 12.4          |                            |
| 9-11 months                               | 27                    | 1.2           | 39                    | 1.2           |                            |
|                                           | <b>Incidence rate</b> | <b>95% CI</b> | <b>Incidence rate</b> | <b>95% CI</b> | <b>p-value<sup>5</sup></b> |
| Type 2 diabetes                           | 1.73                  | (1.42-2.10)   | 1.57                  | (1.33-1.86)   | 0.49                       |

NA: not applicable.

<sup>1</sup> The table provides the number of individuals with information available and the mean or percentages within a given category of the characteristics. <sup>2</sup> P-value from t-tests. <sup>3</sup> Chi-square test. <sup>4</sup>Defined as < 38 weeks of gestational age. <sup>5</sup> P-value from a Cox regression analysis.

**Supplementary Table 9.** Characteristics of those who answered the adult questionnaire (n=3,443) and those who did not (n=2,601) from among included individuals.<sup>1</sup>

| Characteristics                                               | Answer<br>(n=3,443) |            |            | No answer<br>(n=2,601) |            |            | p-value <sup>2</sup> |
|---------------------------------------------------------------|---------------------|------------|------------|------------------------|------------|------------|----------------------|
|                                                               | N                   | Mean (SD)  | Min, max   | N                      | Mean (SD)  | Min, max   |                      |
| Maternal age at birth (years)                                 | 3,443               | 25.7 (6.6) | 14, 46     | 2,601                  | 25.1 (6.4) | 14, 48     | 0.001                |
| Maternal pre-pregnancy BMI (kg/m <sup>2</sup> )               | 3,160               | 21.7 (2.9) | 14.8, 47.8 | 2,323                  | 21.9 (3.1) | 14.7, 46.3 | 0.04                 |
| Parity                                                        | 3,443               | 1.9 (1.2)  | 1, 9       | 2,601                  | 1.9 (1.2)  | 1, 9       | 0.61                 |
| Birth weight (kg)                                             | 3,419               | 3.2 (0.6)  | 0.8, 5.3   | 2,576                  | 3.2 (0.6)  | 0.9, 5.5   | 0.01                 |
| 7-years BMI (kg/m <sup>2</sup> )                              | 1,462               | 15.4 (1.4) | 12.0, 24.3 | 964                    | 15.5 (1.4) | 11.1, 21.1 | 0.02                 |
| Characteristics                                               | n                   |            | %          | n                      |            | %          | P-value <sup>3</sup> |
| Parental social status                                        |                     |            |            |                        |            |            | <0.001               |
| Low: 0-6 points                                               | 632/3,080           |            | 20.5       | 609/2,292              |            | 26.6       |                      |
| Medium: 7-10 points                                           | 1,286               |            | 41.8       | 1,002                  |            | 43.7       |                      |
| High: 11-20 points                                            | 1,162               |            | 37.7       | 681                    |            | 29.7       |                      |
| Breadwinner's education                                       |                     |            |            |                        |            |            | <0.001               |
| Remedial education                                            | 31/3,023            |            | 1.0        | 38/2,236               |            | 1.7        |                      |
| Grade school                                                  | 1,944               |            | 64.3       | 1,584                  |            | 70.8       |                      |
| High school                                                   | 685                 |            | 22.7       | 422                    |            | 18.9       |                      |
| College                                                       | 363                 |            | 12.0       | 192                    |            | 8.6        |                      |
| Maternal marital status, % married                            | 2,256/3,405         |            | 66.3       | 1,517/2,550            |            | 59.5       | <0.001               |
| Attitude toward pregnancy, % wanted                           | 1,548/3,335         |            | 46.4       | 1,009/2,493            |            | 40.5       | <0.001               |
| Categories of maternal pre-pregnancy BMI (kg/m <sup>2</sup> ) |                     |            |            |                        |            |            | 0.13                 |
| < 18.5                                                        | 272/3,160           |            | 8.6        | 204/2,323              |            | 8.8        |                      |
| ≥ 18.5 & < 25                                                 | 2,546               |            | 80.6       | 1,837                  |            | 79.1       |                      |
| ≥ 25 & < 30                                                   | 300                 |            | 9.5        | 233                    |            | 10.0       |                      |
| ≥ 30                                                          | 42                  |            | 1.3        | 49                     |            | 2.1        |                      |
| Maternal diabetes during pregnancy, % yes                     | 33/3,443            |            | 1.0        | 29/2,600               |            | 1.1        | 0.55                 |
| Smoking during the third trimester (cigarettes/day)           |                     |            |            |                        |            |            | 0.001                |
| None                                                          | 1,684/3,401         |            | 49.5       | 1,186/2,551            |            | 46.5       |                      |
| < 3                                                           | 248                 |            | 7.3        | 169                    |            | 6.6        |                      |
| 2-10                                                          | 1,018               |            | 29.9       | 773                    |            | 30.3       |                      |
| 11-20                                                         | 412                 |            | 12.1       | 370                    |            | 14.5       |                      |
| > 20                                                          | 39                  |            | 1.2        | 53                     |            | 2.1        |                      |

**Supplementary table 9.** Continued.

| <b>Characteristics</b>                        | <b>n</b>              | <b>%</b>      | <b>n</b>              | <b>%</b>      | <b>P-value<sup>3</sup></b> |
|-----------------------------------------------|-----------------------|---------------|-----------------------|---------------|----------------------------|
| Gestational weight gain (kg)                  |                       |               |                       |               | 0.45                       |
| < 6                                           | 155/2,106             | 7.4           | 122/1,488             | 8.2           |                            |
| 6-8                                           | 337                   | 16.0          | 260                   | 17.5          |                            |
| 9-10                                          | 402                   | 19.1          | 258                   | 17.2          |                            |
| 11-12                                         | 355                   | 16.9          | 263                   | 17.7          |                            |
| 13-15                                         | 444                   | 21.1          | 294                   | 19.8          |                            |
| >16                                           | 413                   | 19.6          | 293                   | 19.7          |                            |
| Died during the first year of life, % yes     | 0/3,443               | 0             | 0/2,601               | 0             | NA                         |
| Sex, % boys                                   | 1,588/3,443           | 46.1          | 1,469/2,601           | 56.5          | <0.001                     |
| Preterm birth <sup>4</sup> , % yes            | 499/2,799             | 17.8          | 403/2,068             | 19.5          | 0.14                       |
| Birth weight (g)                              |                       |               |                       |               | 0.003                      |
| ≤ 2750                                        | 613/3,419             | 17.9          | 540/2,576             | 21.0          |                            |
| > 2750-3250                                   | 1,145                 | 33.5          | 828                   | 32.1          |                            |
| > 3250-3750                                   | 1,120                 | 32.8          | 815                   | 31.6          |                            |
| > 3750-4250                                   | 431                   | 12.6          | 314                   | 12.2          |                            |
| > 4250-4750                                   | 103                   | 3.0           | 62                    | 2.4           |                            |
| > 4750                                        | 7                     | 0.2           | 17                    | 0.7           |                            |
| Duration of any breastfeeding (months)        |                       |               |                       |               | <0.001                     |
| ≤ 0.5                                         | 894/3,443             | 26.0          | 848/2,601             | 32.6          |                            |
| > 0.5-1                                       | 456                   | 13.2          | 371                   | 14.3          |                            |
| > 1-2                                         | 641                   | 18.6          | 468                   | 18.0          |                            |
| > 2-4                                         | 745                   | 21.6          | 496                   | 19.1          |                            |
| > 4                                           | 707                   | 20.5          | 418                   | 16.1          |                            |
| Age at introduction of spoon feeding (months) |                       |               |                       |               | 0.77                       |
| 0-2                                           | 565/3,100             | 17.5          | 392/2,241             | 17.5          |                            |
| 3-5                                           | 2,109                 | 68.4          | 1,532                 | 68.4          |                            |
| 6-8                                           | 391                   | 12.8          | 286                   | 12.8          |                            |
| 9-11                                          | 35                    | 1.4           | 31                    | 1.4           |                            |
|                                               | <b>Incidence rate</b> | <b>95% CI</b> | <b>Incidence rate</b> | <b>95% CI</b> | <b>p-value<sup>5</sup></b> |
| Type 2 diabetes                               | 1.39                  | (1.16-1.67)   | 1.99                  | 1.66-2.38)    | 0.003                      |

NA: Not applicable.

<sup>1</sup> The table provides the number of individuals with information available and the percentages within a given category of the characteristics. <sup>2</sup> P-value from t-tests. <sup>3</sup> Chi-square test. <sup>4</sup> Defined as < 38 weeks of gestational age.

<sup>5</sup> P-value from a Cox regression analysis.

Note: Of individuals who returned the adult health questionnaire, those who had no information on adult BMI (n=52) were generally not different from those who reported adult BMI (n=3,391; not shown).

**Supplementary Table 10.** Associations between duration of any breastfeeding and type 2 diabetes adjusted for factors early in life and for BMI in childhood (N=2,426) and adulthood (N=3,353) respectively.

| <b>Duration of any breastfeeding (mo)</b> | <b>In sample with BMI at 7 years</b>                 | <b>Adjusted for BMI at 7 years<sup>a</sup></b>       |
|-------------------------------------------|------------------------------------------------------|------------------------------------------------------|
| ≤ 0.5                                     | Reference                                            | Reference                                            |
| > 0.5-1                                   | 0.80 (0.43-1.50)                                     | 0.81 (0.43-1.51)                                     |
| > 1-2                                     | 0.82 (0.47-1.42)                                     | 0.83 (0.48-1.44)                                     |
| > 2-4                                     | 0.67 (0.39-1.16)                                     | 0.66 (0.38-1.15)                                     |
| > 4                                       | 0.51 (0.27-0.96)                                     | 0.50 (0.26-0.95)                                     |
|                                           | <b>In sample with BMI at 41-43 years</b>             | <b>Adjusted for BMI at 41-43 years<sup>b</sup></b>   |
| ≤ 0.5                                     | Reference                                            | Reference                                            |
| > 0.5-1                                   | 0.91 (0.46-1.80)                                     | 0.91 (0.46-1.79)                                     |
| > 1-2                                     | 1.07 (0.60-1.92)                                     | 1.09 (0.61-1.95)                                     |
| > 2-4                                     | 0.86 (0.48-1.55)                                     | 0.92 (0.51-1.67)                                     |
| > 4                                       | 0.38 (0.17-0.84)                                     | 0.44 (0.20-0.98)                                     |
|                                           | <b>Adjusted for putative confounding factors</b>     |                                                      |
|                                           | <b>In sample with BMI at 7 years<sup>c</sup></b>     | <b>Adjusted for BMI at 7 years<sup>a,c</sup></b>     |
| ≤ 0.5                                     | Reference                                            | Reference                                            |
| > 0.5-1                                   | 0.91 (0.48-1.73)                                     | 0.96 (0.51-1.81)                                     |
| > 1-2                                     | 1.00 (0.57-1.77)                                     | 1.05 (0.59-1.85)                                     |
| > 2-4                                     | 0.84 (0.47-1.50)                                     | 0.87 (0.49-1.56)                                     |
| > 4                                       | 0.77 (0.39-1.51)                                     | 0.78 (0.40-1.52)                                     |
|                                           | <b>In sample with BMI at 41-43 years<sup>c</sup></b> | <b>Adjusted for BMI at 41-43 years<sup>b,c</sup></b> |
| ≤ 0.5                                     | Reference                                            | Reference                                            |
| > 0.5-1                                   | 1.09 (0.53-2.21)                                     | 1.07 (0.53-2.18)                                     |
| > 1-2                                     | 1.38 (0.74-2.55)                                     | 1.40 (0.75-2.62)                                     |
| > 2-4                                     | 1.10 (0.59-2.06)                                     | 1.15 (0.61-2.14)                                     |
| > 4                                       | 0.52 (0.23-1.20)                                     | 0.58 (0.25-1.34)                                     |

<sup>a</sup> BMI was categorized into tertiles

<sup>b</sup> BMI at 41-43 years was categorized as normal weight (< 25 kg/m<sup>2</sup>), overweight (≥ 25 to < 30 kg/m<sup>2</sup>), obese (≥ 30 kg/m<sup>2</sup>). Of the 3,391 individuals (112 cases) who had information on BMI at 41-43 years of age, 3,353 individuals (85 cases) were followed to later than age 43 years and thus had an adult BMI measure before they exited the study (due to type 2 diabetes, death, emigration or loss to follow-up).

<sup>c</sup> Adjusted for parental social status and education, maternal body mass index, maternal diabetes during pregnancy, number of cigarettes during the third trimester, gestational weight gain, pregnancy number, preterm birth, birth weight and sex.
